# Supplementary material for: Tumor Microenvironment in Male Breast Carcinoma with Emphasis on Tumor Infiltrating Lymphocytes and PD-L1 Expression
Source: MDPI journal article supplement (doi:10.3390/ijms24010818), 2023-01-03
Supplement: s1 [file s1]

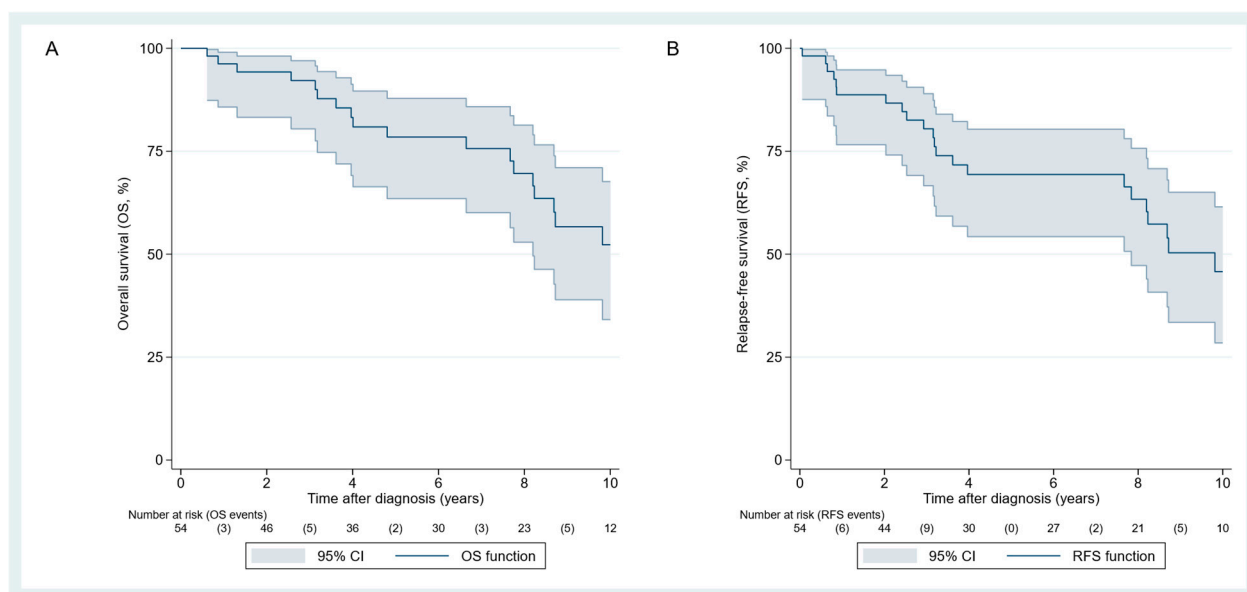

**Supplementary Figure S1.** Overall survival (A) and recurrence-free survival (B) experience of the non-metastatic cohort of 54 patients where follow-up data were available. OS and RFS were estimated with a Kaplan-Meier estimator. The grey-shaded area represents the 95% confidence interval. The risk table below the graph shows numbers of OS and RFS events occurring within the respective interval report in round brackets.

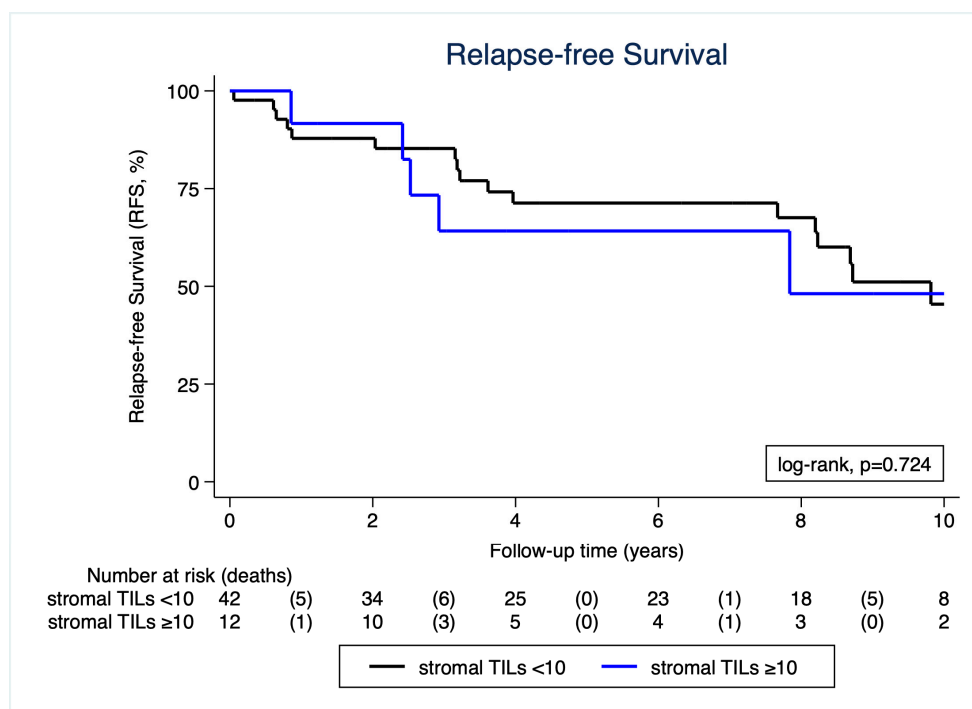

**Supplementary Figure S2.** Relapse-free survival for sTILs with a cut-off of 10% in the cohort of 54 patients.

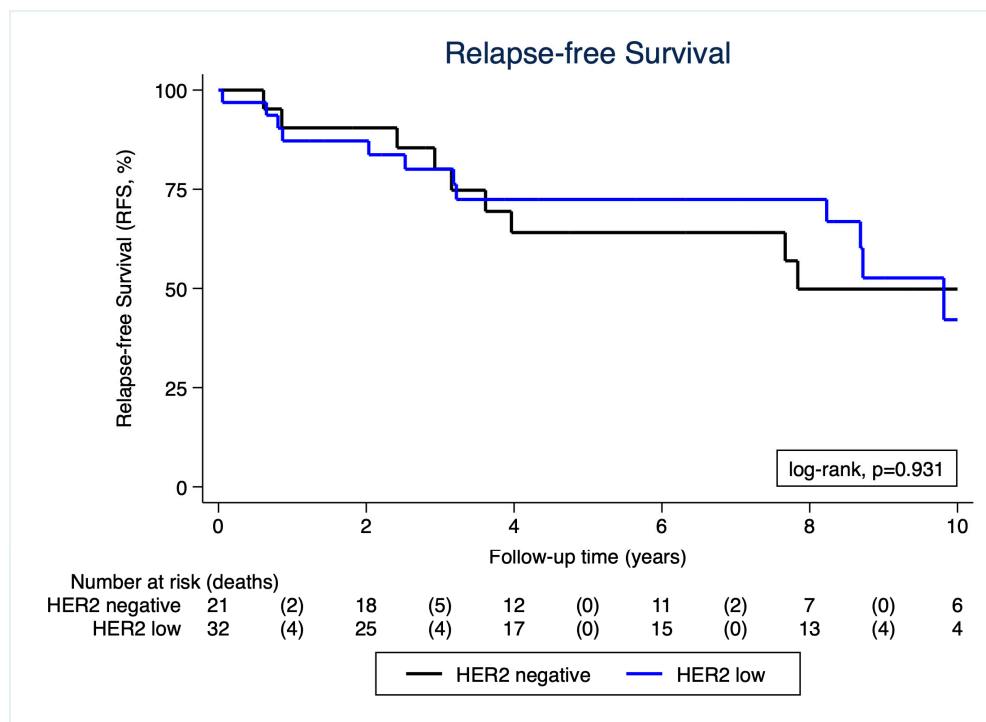

**Supplementary Figure S3.** Relapse-free survival for HER2-negative and HER2-low tumors in the cohort of 54 patients.
